# Supplementary material for: Resveratrol Inhibits the Tumorigenesis of Follicular Thyroid Cancer via ST6GAL2-Regulated Activation of the Hippo Signaling Pathway
Source: PubMed Central journal article supplement — Mol Ther Oncolytics. 2020 Jan 10;16:124–33. doi: 10.1016/j.omto.2019.12.010 (PMC7005482; doi:10.1016/j.omto.2019.12.010), 2020-01-10
Supplement: mmc1.pdf [file mmc1.pdf]

**OMTO, Volume 16**

**Supplemental Information**

**Resveratrol Inhibits the Tumorigenesis of  
Follicular Thyroid Cancer via ST6GAL2-Regulated  
Activation of the Hippo Signaling Pathway**

**Gaoran Xu, Junzhu Chen, Guorong Wang, Junhong Xiao, Ning Zhang, Yanyu Chen, Haoran Yu, Guangzhi Wang, and Yongfu Zhao**

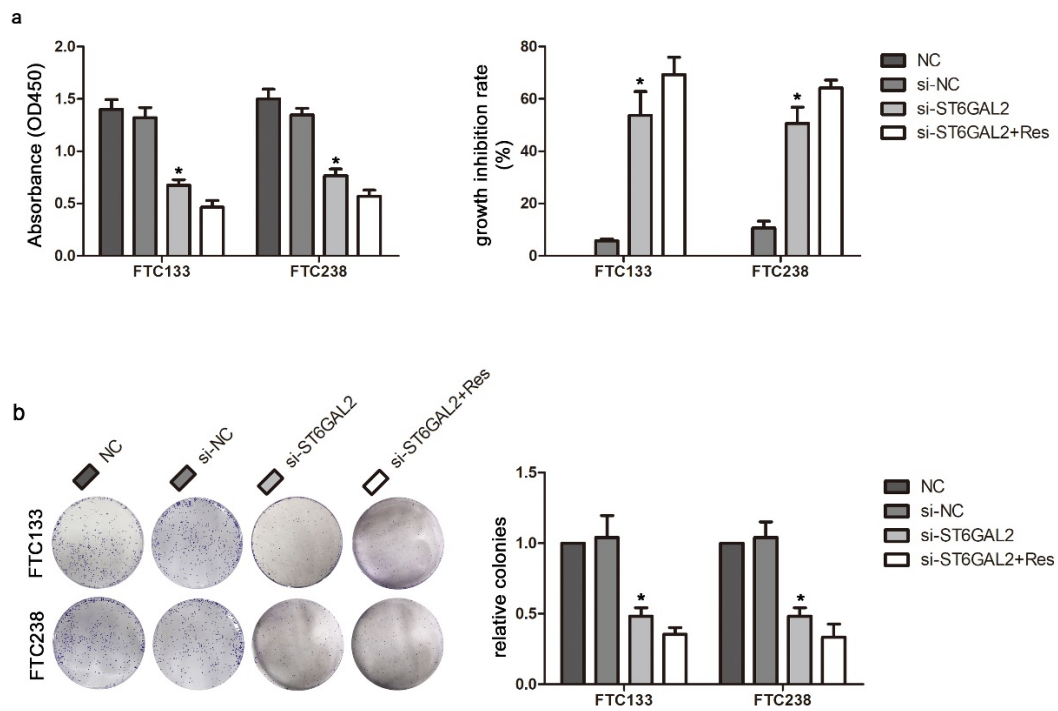

Figure S1: Effects of different treatments on FTC cell proliferation

a, b. CCK-8 viability assays and colony formation assays were performed to determine proliferation ability of FTC cells by different treatments. (\* $p$  value < 0.05, scale bars: 20  $\mu$ m).
